# Supplementary material
Source: PubMed Central journal article supplement (PMC6275909)
Supplement: 11658_2011_20_MOESM1_ESM.pdf [file 11658_2011_20_MOESM1_ESM.pdf]

Supplementary material

**PROTECTIVE EFFECT OF INTERMEDIN ON MYOCARDIAL CELL  
IN A RAT MODEL OF SEVERE ACUTE PANCREATITIS**

XIAODONG DU<sup>1</sup>, YU CAO<sup>1</sup>, PING XUE<sup>2</sup>, ZIQI LIN<sup>2</sup>, ZHI ZENG<sup>3\*</sup>  
and QING XIA<sup>2</sup>

<sup>1</sup>Department of Emergency Medicine, <sup>2</sup>Traditional Chinese Medicine and Western Medicine, <sup>3</sup>Cardiovascular Medicine, West China University Hospital and West China Medical School, Sichuan University, Chengdu 610041, China

Suppl. Tab. 1. PCR primer sequences and product sizes of studied genes.

| Gene                    | Primer sequence                                                                                      | Fragment length (bp) |
|-------------------------|------------------------------------------------------------------------------------------------------|----------------------|
| Rat Bax (TM)            | R-BAXF: GTTCATCCAGGATCGAGCA<br>R-BAXR: CAATCATCCTCTGCAGCTCC<br>R-BAXTM: CAAGAAGCTGAGCGAGTGTCTC       | 151                  |
| Rat Bcl-2 (TM)          | R-BCL2F : GATTGTGGCCTTCTTTGAGTT<br>R-BCL2R : AGTTCCACAAAGGCATCCCA<br>R-BCL2TM: CCTGAACCGCATCTGCACACC | 151                  |
| Rat RAMP1 (TM)          | R- RAMP1F: CTGTGTCTCAGCCGTTCAA<br>R- RAMP1R: ATGGGCCAGAAACAGCCAA<br>R- RAMP1TM: TGGTCTTTCCCCAGTCACAC | 144                  |
| Rat RAMP2 (TM)          | R- RAMP2F: ACTGGTGCAACTGGACTT<br>R- RAMP2R: GTATCAGGTGAGCCTCAAG<br>R- RAMP2TM: CTGGGCTTCCCAAATCCC    | 135                  |
| Rat RAMP3 (TM)          | R- RAMP3F: GGAAGTGGTGCAACCTGT<br>R- RAMP3TM: CTGCTACTGGCCCAACCC<br>R- RAMP3R: CAGTTGAAAAGAACTGCCT    | 151                  |
| Rat IMD (TM)            | R- ADM2F: CCCAGTTGCTGATGGTCA<br>R- ADM2R: GCTGGGGGTTCTCTGGGT<br>R- ADM2TM: CGGTTGCATCAGCCTCCTC       | 112                  |
| Rat $\beta$ -actin (TM) | ACTBF: GAAGATCAAGATCATTGCTCCT<br>ACTBR: TACTCTGCTTGCTGATCCA<br>ACTBTM: CTGTCCACCTTCCAGCAGA           | 111                  |

IMD = intermedin; RAMP = receptor-activity-modifying protein.

\* Author for correspondence. e-mail: dxd1204@163.com, phone: 86-28-85423709, fax: 86-28-85422288

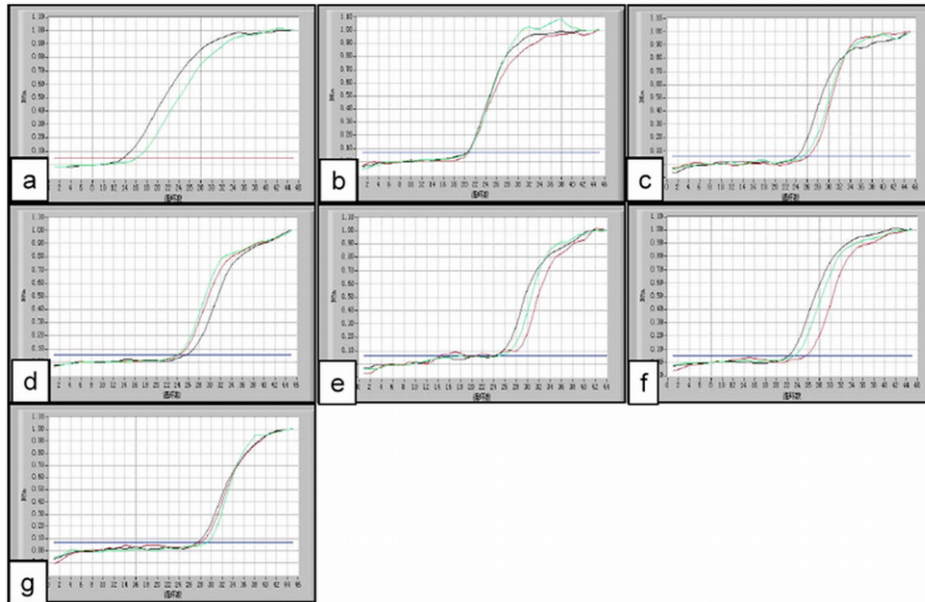

Suppl. Fig. 1. Real-time PCR amplification plot. Representative real-time PCR amplification plots for mRNA expression of IMD (a),  $\beta$ -actin (b), Bax (c), Bcl-2 (d), RAMP1 (e), RAMP2 (f) and RAMP3 (g).
